# Supplementary material
Source: PubMed Central journal article supplement (PMC5068523)
Supplement: JVI.00852-16_zjv999182053so1.pdf [file JVI.00852-16_zjv999182053so1.pdf]

## Additional files for

### **CAR-T Cells Guided by the Single-Chain Fv of a Broadly Neutralizing Antibody Specifically and Effectively Eradicate the Reactivated Virus-latently-infected CD4<sup>+</sup> T-lymphocytes Isolated from HIV-1-infected Individuals Receiving Suppressive cART**

Bingfeng Liu<sup>1,2,3§</sup>, Fan Zou<sup>1,2,3§</sup>, Lijuan Lu<sup>1,2,3</sup>, Cancan Chen<sup>1,2,3</sup>, Dalian He<sup>1,2,3</sup>, Xu Zhang<sup>1,2,3</sup>, Xiaoping Tang<sup>4</sup>, Chao Liu<sup>1,2,3</sup>, Linghua Li<sup>4\*</sup>  
and Hui Zhang<sup>1,2,3\*</sup>

This file includes:

Supplemental Data (Supplemental Table S1 to S2, Supplemental Figure. S1)

## Supplemental data

### Supplemental Table S1. The sequences of VRC01-28BBZ.

---

#### Quantitative real-time RT-PCR analysis

##### VRC01 scFv

atggaaattgtgtgacacagtcctccaggcaccctgtcttctccaggggaaacagccatcatctctgtcgaccagtcagtatggctccttagc  
ctggtatcaacagaggccggccaggccccaggctcgtcatctattcggctctactcggccgctggcatcccagacaggtcagcggcag  
tcggggggggccagactacaatctcaccatcagcaacctggagtcgggagatttgggtttattatgccagcagatgaatttttggccagggg  
accaaggtccaggtcgacattaagcgagaggcagaggaagtctgctaacatgcgggtgacgtcgaggagaatcctggccaggtgacgtggt  
gcagctctgggggtcagatgaaagcctggcgagtcgatgagaattctgtcgggcttctgatatgaattattgattgtacgtaaatggattc  
gtctgccccggaaaaagcctgagtgatgggatggctgaagcctcggggggggccgtaactacgcacgtccactttagggcagagt  
gacctgactcgagacgtttatccgacacagccttttggagctcgctcgttgacagtagacgacacggccgtctactttgtactaggggaaaa  
aactgtgattacaattgggactcgaacactggggcggggcaccctcgtcatcgtctcatca

##### 28BBZ-1

gggggagcgggtcagcggaggtggctctggcgggagcgttcgtgccgtcttctccagcgaagcccaccacgacgccagcgc  
cgcgaccaccaacaccggcgccaccatcgcgtcgcagcccctgtccctgcgccagaggcgtgccggccagcggcggggggcgcagtg  
cacacgaggggggtgacttcgcctgtgatactacatctggcgcccttggccgggactgtgggctcttctctgtcactggttatcccttt  
actgcaaccacaggaacaggagtaagaggagcagctcctgcacagtgactacatgaacatgactccccgccccccggccccaccgca  
gcattaccagcctatgccccaccacgcacttcgcagcctatcgtccggttctctgttgaacggggcagaagaagcctctgtatatctc  
aaacaaccattatgagaccagtacaactactcaagaggaagatggctgtagctgccgattccagaagaagaagaggagatgtaactga  
gagtgaagttcagcaggagcgcagacgccccgcgtaccagcaggccagaaccagctctataacgactcaatgagacgaagagagga  
gtacgatgtttggacaagagacgtgccgggaccctgagatgggggaaaagccgagaaggaagaacctcaggaaggcctgtacaatgaa  
ctgcagaagataagatggcgaggcctacagtgagattgggatgaaagcgcagcgggaggggcaaggggcacgatggcctttaccag  
ggtctcagtagcaccaccaaggacacctacgaccccttcacatgcagggcctgccccctcgcgattacaaggatgacgacgataagtaa

##### 28BBZ-2

gggggagcgggtcagcggaggtggctctggcgggagcgttcccggaccttcaagccctttgggtgctggtggtggtgggaggt  
cctggtctgctatagctgctagtaacagtgcccttattatttctgggtgaggagtaagaggagcaggtcctgcacagtgactacatgaacatga  
ctccccgccccccggccccaccgcaagcattaccagcctatgccccaccacgcacttcgcagcctatcgtcctcaaacggggcagaag  
aaactcctgtatatattcaacaaccattatgagaccagtacaactactcaagaggaagatggctgtagctgccgattccagaagaagaaga  
ggagagatgtaactgaagttcagcaggagcgcagacgccccgcgtaccagcaggccagaaccagctctataacgactcaatcagtagc  
gaagagaggagtacgatgtttggacaagagacgtgccgggaccctgagatgggggaaaagccgagaagaagaacctcaggaag  
gcctgtacaatgaactgcagaagataagatggcgaggcctacagtgagattgggatgaaagcgcagcgggaggggcaaggggcacg  
atggcctttaccaggtctcagtagcaccaccaaggacacctacgaccccttcacatgcagggcctgccccctcgcgattacaaggatgacga  
cgataagtaa

---

**28BBZ-3**

ggtaggcgggtcagcggaggtggctctggcgggtggcgatcgttcccggaccttaagccctttgggtgctggtggtggtggtagt  
cctggctgctatagctgctagtaacagtgccctttattttctgggtgaggagtaagaggagcaggctcctgcacagtgactacatgaacatga  
ctcccccccccggcccaccgcaagcattaccagccctatccccaccacgcgacttcgcagcctatcgctccggtggagcggttcaa  
aacggggcagaaagaactcctgtatataatcaacaaccattatgagaccagtacaaactactcaagaggaagatggctgtagctgccgattc  
cagaagaagaagaggatgtgaactggcgggtggcgatcgaagttcagcaggagcgcagacgccccgcgtaccagcagggccag  
aaccagctctataacgagctcaatctaggacgaagagaggagtacgatgtttggacaagagacgtggccgggaccctgagatggggggaaa  
gcccagagaaggaagaaccctcaggaaggcctgtacaatgaactgcagaagataagatggcggagcctacagtgagattgggatgaaa  
ggcgagcggcgaggggcaaggggcacgatggccttaccaggtctcagtacagccaccaaggacacctacgacgccttcacatgcagg  
ccctgccccctcgcgattacaaggatgacgacgataagtaa

---

**Supplemental Table S2.** The primer sequences design.

---

**Quantitative real-time RT-PCR analysis**

|                                           |                              |
|-------------------------------------------|------------------------------|
| <b>hGAPDH F</b>                           | AGAAGGCTGGGGCTCATTTG         |
| <b>hGAPDH R</b>                           | AGGGGCCATCCACAGTCTTC         |
| <b>h<math>\beta</math>-actin-F</b>        | TCCTCCCTGGAGAAGAGCTA         |
| <b>h<math>\beta</math>-actin-R</b>        | TCAGGAGGAGCAATGATCTTG        |
| <b>SK38</b>                               | ATAATCCACCTATCCCAGTAGGAGAAA  |
| <b>SK39</b>                               | TTTGGTCCTTGTCTTATGTCCAGAATGC |
| <b>HIVTotRNA-5F</b>                       | CTGGCTAACTAGGGAACCCACTGCT    |
| <b>HIVTotRNA-5R</b>                       | GCTTCAGCAAGCCGAGTCCTGCGTC    |
| <b>qGFP-F1</b>                            | AGATCCGCCACAACATCGAG         |
| <b>qGFP-R1</b>                            | GTCCATGCCGAGAGTGATCC         |
| <b>qGFP-F2</b>                            | CAAGATCCGCCACAACATCG         |
| <b>qGFP-R2</b>                            | GACTGGGTGCTCAGGTAGTG         |
| <b>qPCR(CD3<math>\zeta</math>-flag)-F</b> | GCCTTTACCAGGGTCTCA           |
| <b>qPCR(CD3<math>\zeta</math>-flag)-R</b> | ACTTATCGTCGTCATCCTTG         |
| <b>qPCR(VRC-01)-F</b>                     | ATTTTTTGGCCAGGGGACC          |
| <b>qPCR(VRC-01)-R</b>                     | AGGATTCTCCTCGACGTCACC        |

---

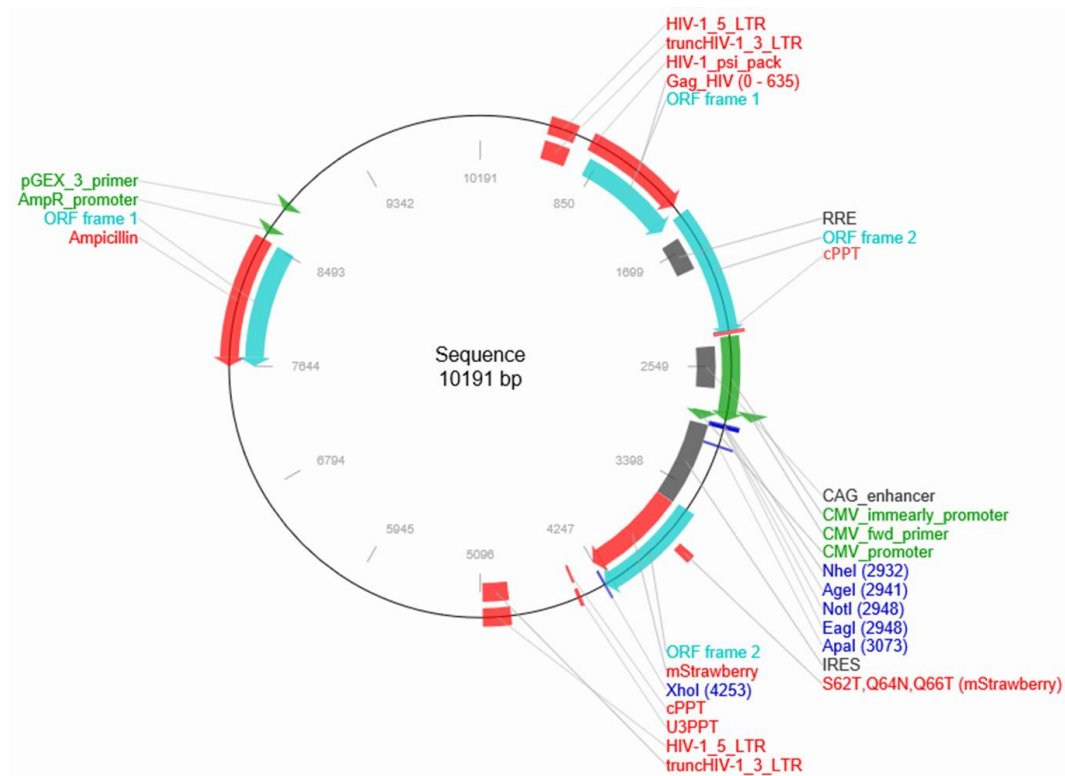

**Supplemental Figure S1.** The map of pCPPT-IRES-mStrawberry. pCPPT-IRES-mStrawberry is HIV-1-derived lentiviral vector originally constructed by our own lab. The vector contains elements that allow packaging of the foreign gene into lentiviral particles to infect both dividing and non-dividing mammalian cells, and introduce high-level gene expression in target cells after integrating into the genome. The lentiviral vector contains *cis*-acting sequences of HIV-1 required for packaging, reverse transcription, and integration, as well as single restriction sites (NheI, AgeI, NotI, EagI and ApaI) for the cloning of heterologous genes. All the sequences for Gag, Pol, Env, regulatory and accessory proteins was removed except for a 659 bp sequence in p17 without ATG initiation codon for efficient packaging, The Rev response element (RRE), polypurine tract (PPT) element, and central PPT (cPPT)

element were included in the pCPPT-IRES-mStrawberry vector. The only detectable expression originated from the internal CMV promoter of the vector in the absence of these transacting factors. The sequences of IRES and mStrawberry were inserted into pCPPT-IRES-mStrawberry downstream of the CMV promoter to serve as reporter genes.
